# Supplementary material for: Ultrathin Fe-MOFs modified by Fe9S10 for highly efficient oxygen evolution reaction
Source: Royal Society of Chemistry journal article supplement (doi:10.1039/d3dt03494a), 2023-12-25
Supplement: d3dt03494a1.pdf [file d3dt03494a1.pdf]

## Supporting Information

### Ultrathin Fe-MOF modified by Fe<sub>9</sub>S<sub>10</sub> for highly efficient oxygen evolution reaction

Wenjing Shang, Binghao Wang, Xin Deng, Yiqin Tian, Yongbing Lou, Jinxi Chen \*

*School of Chemistry and Chemical Engineering, Jiangsu Engineering Laboratory of Smart Carbon-Rich Materials and Device, Southeast University, Nanjing 211189, PR China*

*\*Corresponding author*

*\*E-mail address: chenjinxi@seu.edu.cn (J. Chen)*

#### 1. Calculation formulas

The calculation formulas used in this paper were showed as follows:

Overpotential:  $\eta = E_{\text{RHE}} - 1.23 \text{ V}$ ,  $E_{\text{RHE}} = E_{\text{Ag/AgCl}} + 0.059 * \text{pH} + 0.197 \text{ V}$

where  $E_{\text{RHE}}$  referred to reversible hydrogen electrode potential.

Tafel slope:  $\eta = b \log j + a$ ,

where  $b$  was the Tafel slope. It was derived from the LSV curve,  $\log j$  ( $j$  was the current density) as the abscissa and  $\eta$  as the ordinate, and the resulting slope was called the Tafel slope.

$2C_{\text{dl}}$  is estimated by plotting  $\Delta J = (J_{\text{a}} - J_{\text{c}})$  at 0.94 V against the scan rates.

Faradic efficiency:  $\text{FE} = (V/V_{\text{m}})/n$ ,

Where  $V$  represents the actual volume of O<sub>2</sub> collected,  $V_{\text{m}}$  represents the molar volume of gas at the corresponding temperature at the time of the test.  $n$  represents the number of molars of gas theoretically released.

Turnover Number:  $\text{TON} = n_{\text{O}_2}/n_{\text{cat}}$ , where  $n_{\text{O}_2}$  is the number of molars of generated O<sub>2</sub>,  $n_{\text{cat}}$  is the number of molars of catalyst.

Turnover Frequency:  $\text{TOF} = \text{TON}/t$ , where  $t$  is time

#### 2. Chemical

Urea (CH<sub>4</sub>N<sub>2</sub>O, ≥99.0%), ammonium fluoride (NH<sub>4</sub>F, ≥98.0%), iron nitrate nonahydrate (Fe(NO<sub>3</sub>)<sub>3</sub>·9H<sub>2</sub>O, ≥99.9%), sodium sulfide nonahydrate (Na<sub>2</sub>S·9H<sub>2</sub>O, ≥98.0%), 1,4-benzenedicarboxylic acid (C<sub>8</sub>H<sub>6</sub>O<sub>4</sub>, ≥99.0%), sodium hydroxide (NaOH, ≥97.0%), and N,N-dimethylformamide (DMF, ≥99.5%) were purchased from Aladdin (Shanghai). Hydrochloric acid

(HCl, 36%~38%) and ethanol ( $C_2H_5OH$ ,  $\geq 99.5\%$ ) were bought from Sinopharm Chemical Reagent Co., Ltd (Shanghai). Ultrapure water and nickel foam (NF) were bought from Crystal chemical (Nanjing). The above chemical was used directly without further treatment.

### 3. The preparation of NF

Due to the presence of dirt and oxidation layers on the surface of NF, it was necessary to clean before using. The NF purchased was cut to the size of  $1 \times 1.5 \text{ cm}^2$ , and then it was immersed in the 3 M HCl solution prepared in advance. Cleaning with an ultrasonic cleaner for 20 minutes was employed. Then deionized water and ethanol were used for ultrasonic cleaning for 10min respectively, and then the NF was dried under vacuum at  $60 \text{ }^\circ\text{C}$  for 12 h.

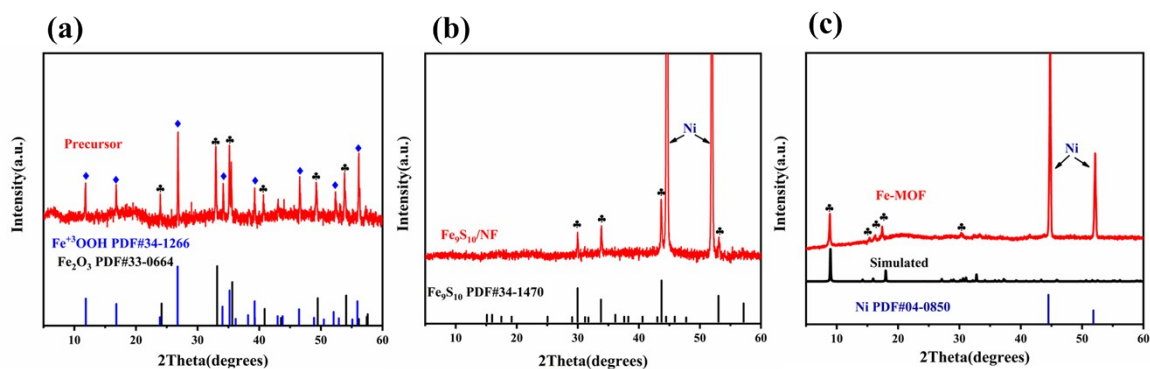

**Fig. S1.** XRD patterns of a) precursor, b)  $Fe_9S_{10}/NF$  and c)  $Fe-MOF/NF$

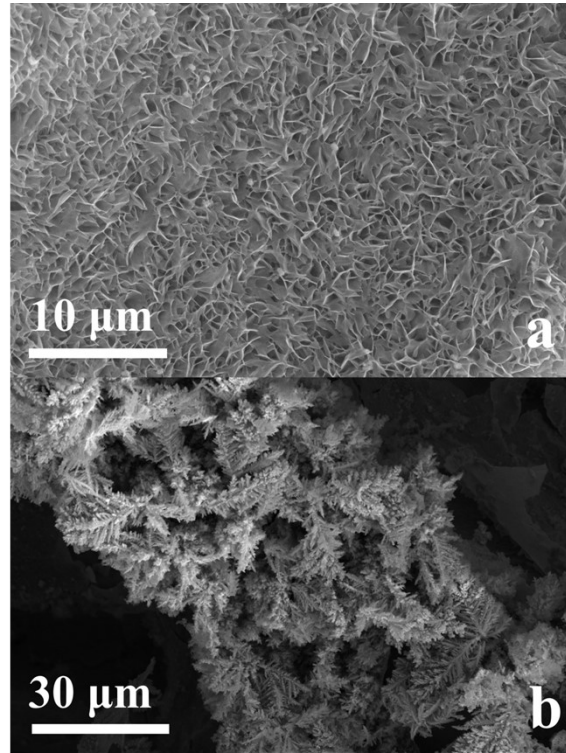

**Fig. S2.** SEM images of a,) Fe-MOF/NF, b)  $\text{Fe}_9\text{S}_{10}$ /NF

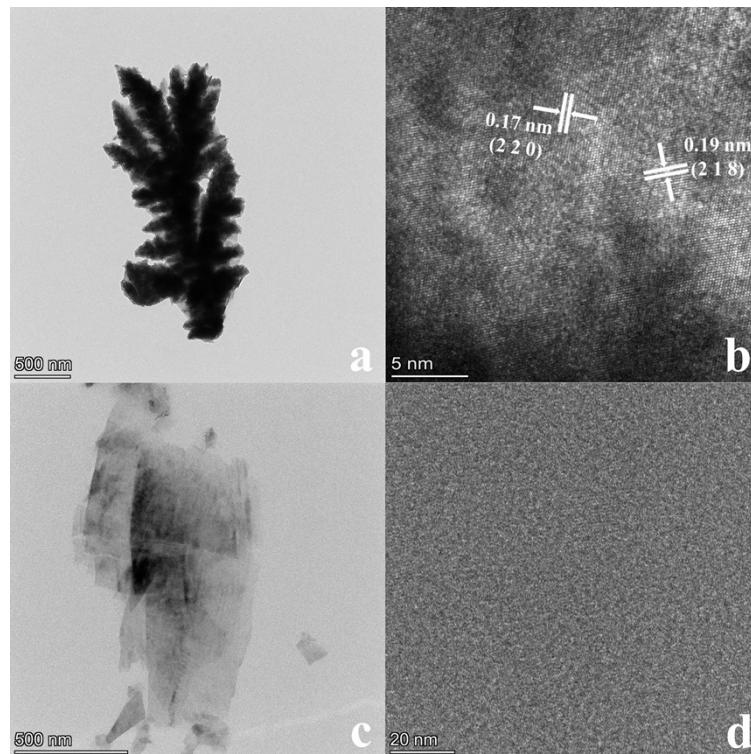

**Fig. S3.** TEM images of a, b)  $\text{Fe}_9\text{S}_{10}$ /NF, c, d) Fe-MOF/NF

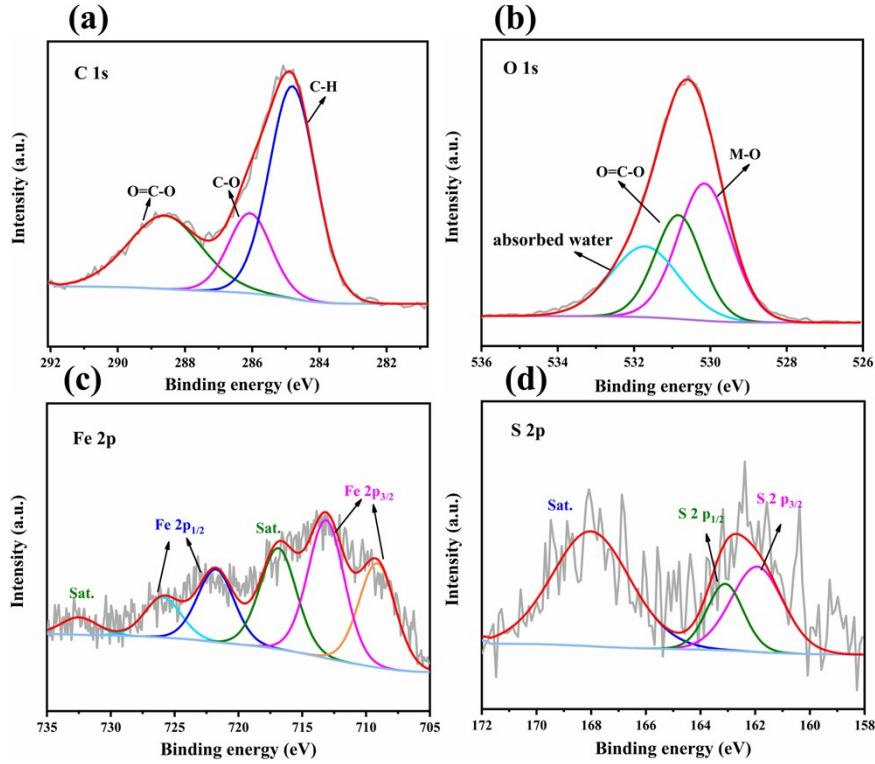

Fig. S4. XPS spectra of C1s, O1s, Fe2p, S2p in Fe<sub>9</sub>S<sub>10</sub>/Fe-MOF/NF-2 before OER

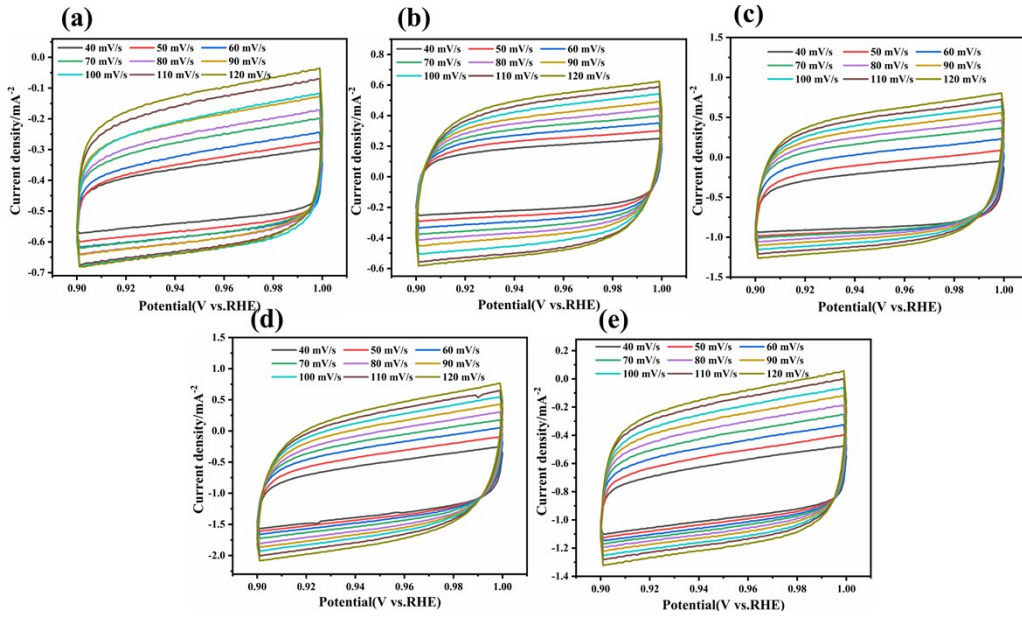

Fig. S5. CV curves of a) Fe-MOF, b) Fe<sub>9</sub>S<sub>10</sub>/NF, c) Fe<sub>9</sub>S<sub>10</sub>/Fe-MOF/NF-1, d) Fe<sub>9</sub>S<sub>10</sub>/Fe-MOF/NF-2, e) Fe<sub>9</sub>S<sub>10</sub>/Fe-MOF/NF-3 at different scan rates

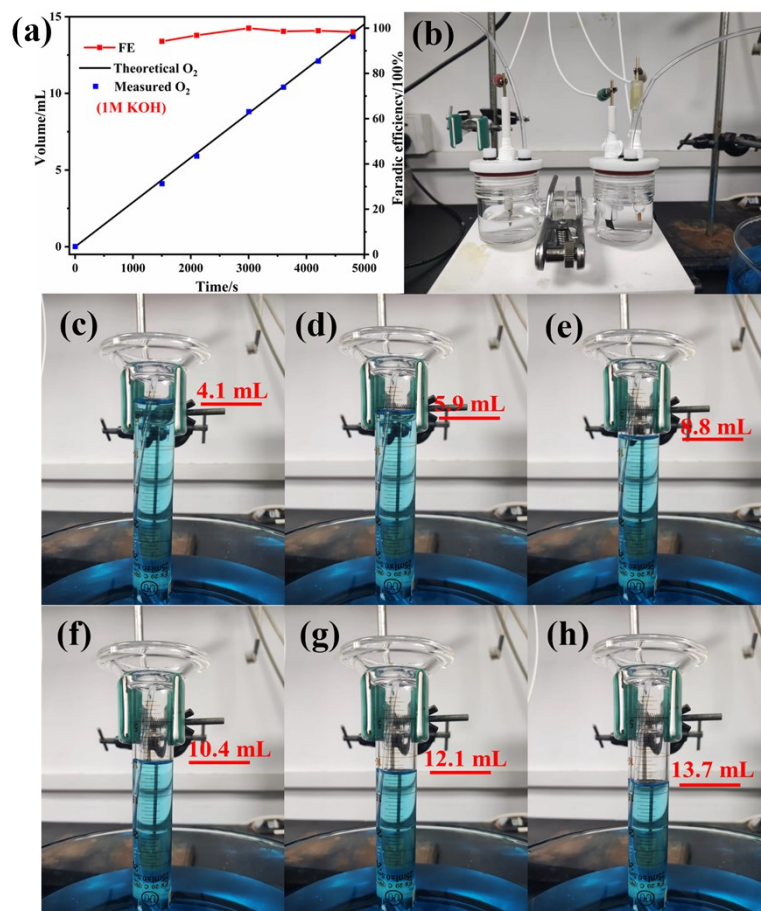

**Fig. S6** a) Faradic efficiency, b) the device of drainage gas collection method, c-h) the volume of oxygen collected over time in 1 M KOH

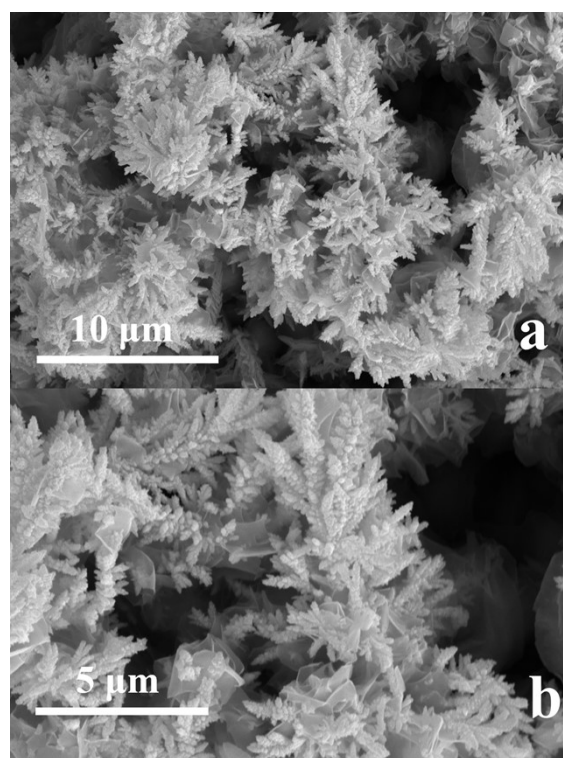

**Fig. S7.** SEM images of Fe<sub>9</sub>S<sub>10</sub>/Fe-MOF/NF-2 after OER

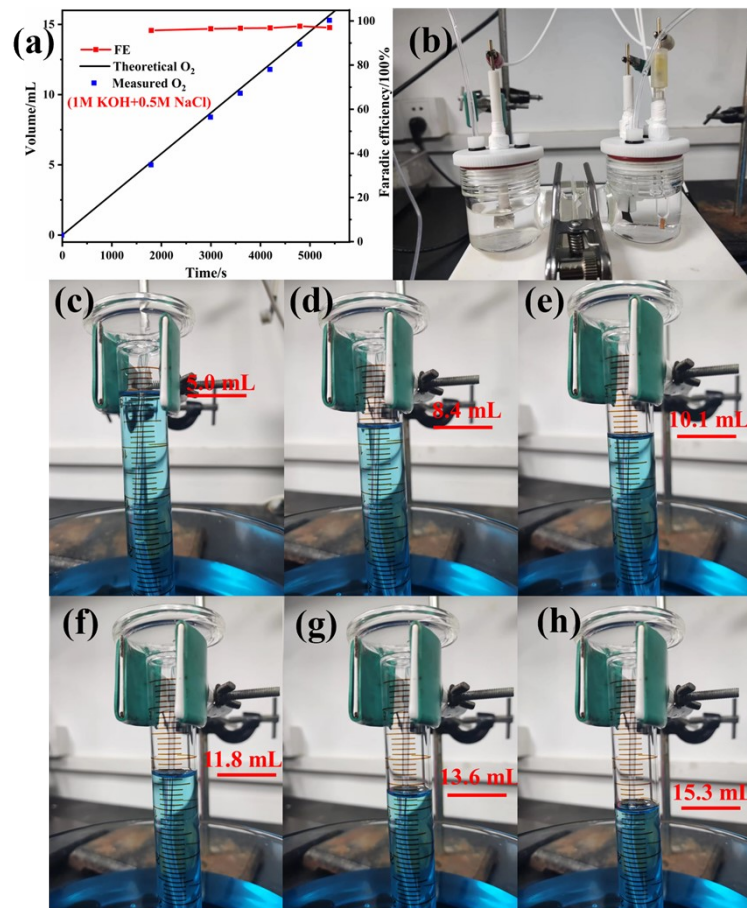

**Fig S8** a) Faradic efficiency, b) the device of drainage gas collection method, c-h) the volume of oxygen collected over time in 1 M KOH+0.5M NaCl

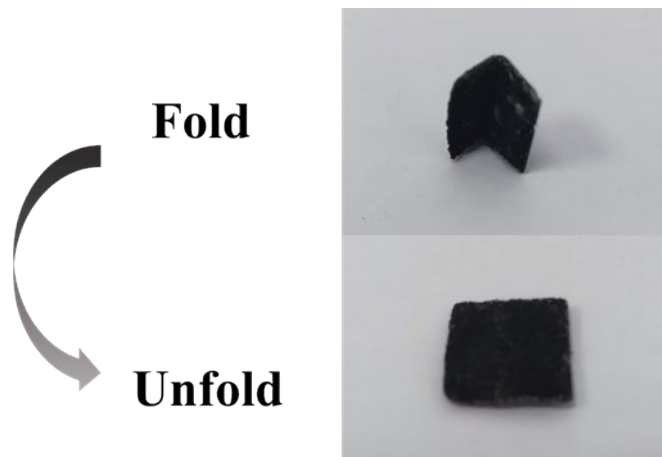

**Fig. S9.** Photos of Fe<sub>9</sub>S<sub>10</sub>/Fe-MOF/NF-2 when folded and unfolded

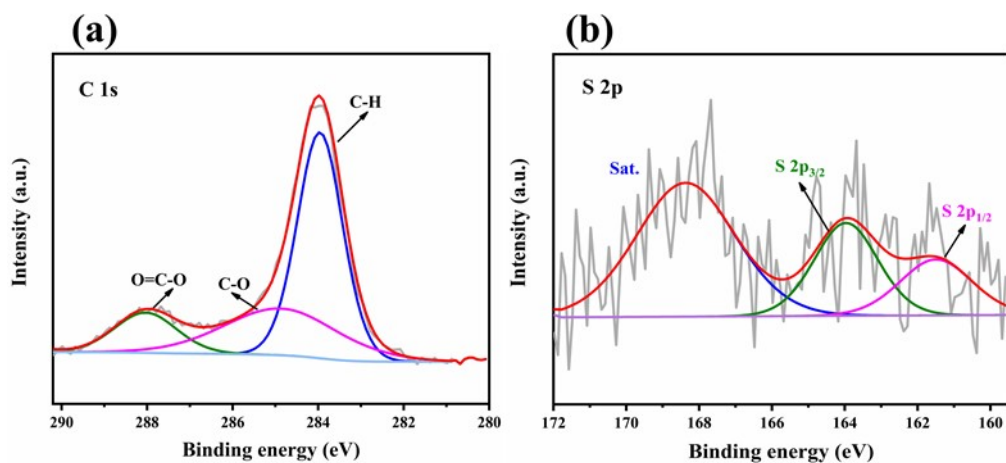

Fig. S10. XPS spectra of C1s, O1s in Fe<sub>9</sub>S<sub>10</sub>/Fe-MOF/NF-2 before OER

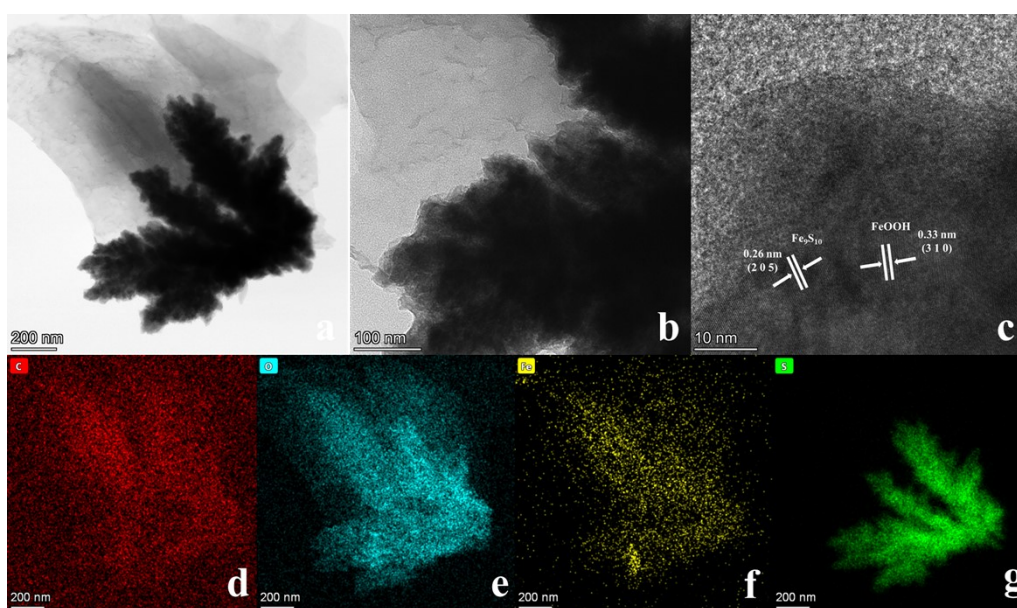

Fig. S11. a, b) TEM images, c) HRTEM images, d, e, f, g) elemental mapping of Fe<sub>9</sub>S<sub>10</sub>/Fe-MOF/NF after OER

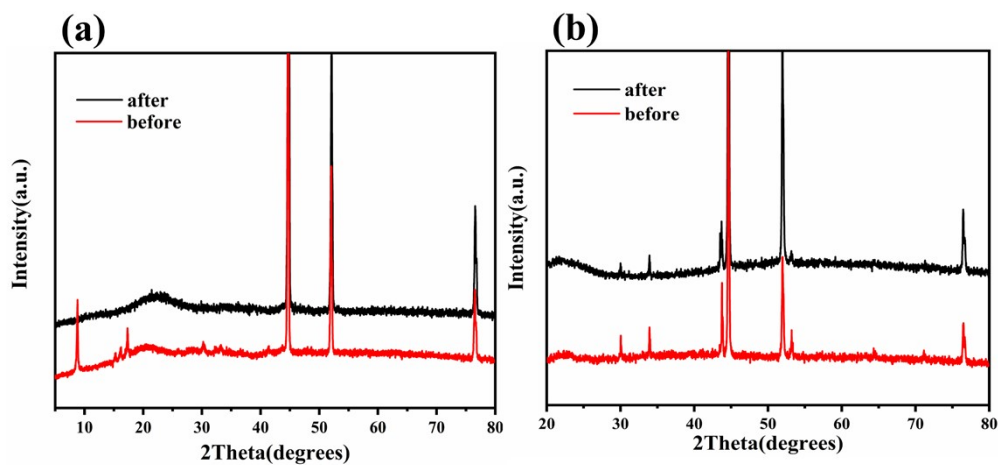

Fig. S12. XRD patterns of a) Fe-MOF/NF, b) Fe<sub>9</sub>S<sub>10</sub>/NF before and after reaction

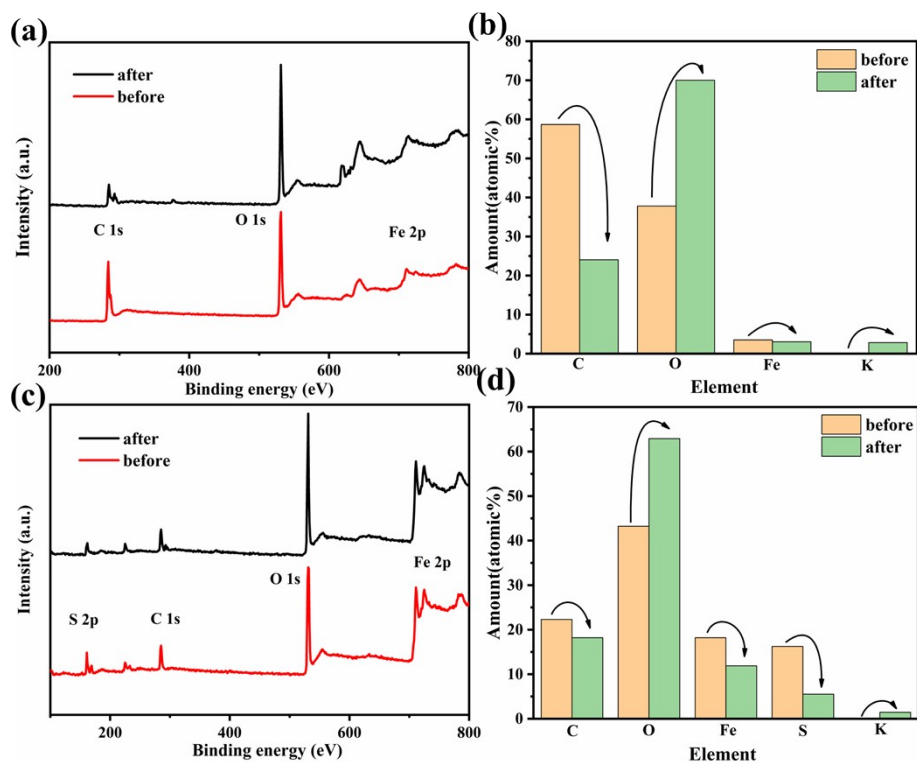

**Fig. S13.** survey spectrum of a) Fe-MOF/NF, c) Fe<sub>9</sub>S<sub>10</sub>/NF, and the changes in the content of elements of b) Fe-MOF/NF, d) Fe<sub>9</sub>S<sub>10</sub>/NF before and after OER test

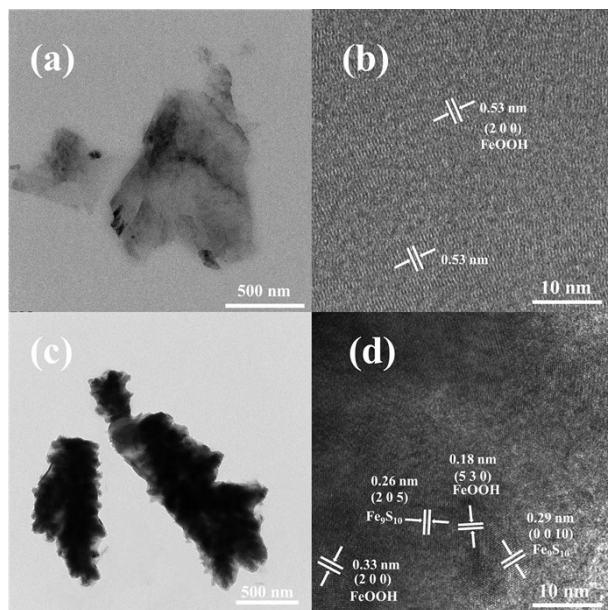

**Fig. S14.** TEM images of a) Fe-MOF/NF, c) Fe<sub>9</sub>S<sub>10</sub>/NF and HRTEM images of b) Fe-MOF/NF, d) Fe<sub>9</sub>S<sub>10</sub>/NF after reaction

**Table S1.** Comparison of OER performance in this work with recently reported materials introduced into S by the postprocessing of precursors electrocatalysts

| Catalysts | Overpotential (mV)/ current density (mA cm <sup>-2</sup> ) | Tafel slope (mV/dec) | Stability time (h) | Support | Reference |
|-----------|------------------------------------------------------------|----------------------|--------------------|---------|-----------|
|           |                                                            |                      |                    |         |           |



| <b>Fe<sub>9</sub>S<sub>10</sub>/Fe-MOF/NF-2</b>                         | <b>202/10, 225/50</b> | <b>34</b> | <b>90</b> | <b>NF</b> | <b>This work</b> |
|-------------------------------------------------------------------------|-----------------------|-----------|-----------|-----------|------------------|
| Ni <sub>3</sub> S <sub>2</sub> /MIL-53(Fe)                              | 214                   | 33.8      | 23        | NF        | 1                |
| CoMoO <sub>4</sub> /Fe-MOF                                              | 238                   | 49        | 30        | NF        | 2                |
| NiMoO <sub>4</sub> /Ni-MOF/NF                                           | 218                   | 68        | 20        | NF        | 3                |
| Co <sub>3</sub> O <sub>4</sub> @Co-MOF                                  | 277                   | 79        | -         | GC        | 4                |
| NM50-Ni <sub>3</sub> S <sub>4</sub> /NF                                 | 257                   | 67        | 300       | NF        | 5                |
| S-NiFe(CN) <sub>5</sub> NO-500                                          | 274                   | 54        | 30        | GC        | 6                |
| Fe <sub>0.5</sub> Ni <sub>0.5</sub> Co <sub>2</sub> -S/NF               | 251/50                | 73        | 25        | NF        | 7                |
| NiCo <sub>2</sub> S <sub>4</sub> /CC                                    | 290/50                | 139       | 10        | CC        | 8                |
| CoS <sub>2</sub> -MoS <sub>2</sub> HNAs/Ti                              | 266                   | 104       | 24        | TF        | 9                |
| Cr-NiS <sub>2</sub> /C@NF                                               | 207                   | 43        | 80        | NF        | 10               |
| PBA-SA                                                                  | 261                   | 38        | 15        | RD        | 11               |
| FeNi <sub>2</sub> -400-S                                                | 214                   | 80        | 12        | GC        | 12               |
| Co <sub>9</sub> S <sub>8</sub> /Zn <sub>0.8</sub> Co <sub>0.2</sub> S@C | 292                   | 52        | 5.5       | GC        | 13               |
| NiCo <sub>2</sub> S <sub>4</sub> /FeOOH                                 | 200                   | 71        | 20        | CC        | 14               |

NF: Ni Foam

CC: Carbon Cloth

GC: Glassy Carbon

TF: Ti Foil

RD: Rotating Disk

**Table S2** The TON and TOF of catalysts

| <b>Catalysts</b>                             | <b>TON</b> | <b>TOF (s<sup>-1</sup>)</b> |
|----------------------------------------------|------------|-----------------------------|
| Fe <sub>9</sub> S <sub>10</sub> /Fe-MOF/NF-2 | 122.4      | 0.034                       |
| Fe-MOF/NF                                    | 3.6        | 0.0011                      |
| Fe <sub>9</sub> S <sub>10</sub> /NF          | 25.2       | 0.0072                      |

## Reference

1. F. Wu, X. X. Guo, Q. H. Wang, S. W. Lu, J. L. Wang, Y. B. Hu, G. Z. Hao, Q. L. Li, M. Q. Yang and W. Jiang, *J. Mater. Chem. A*, 2020, **8**, 14574-14582.
2. Q. L. Li, X. Li, K. Zhang, J. Q. He, Y. B. Lou and J. X. Chen, *Inorg. Chem. Commun.*, 2023, **153**, 110835.
3. Q. L. Li, K. Zhang, X. Li, J. Q. He, Y. B. Lou and J. X. Chen, *J. Alloys Compd.*, 2022, **920**, 165941.
4. S. S. Zheng, X. T. Guo, H. G. Xue, K. M. Pan, C. S. Liu and H. Pang, *Chem Commun (Camb)*, 2019, **55**, 10904-10907.
5. K. Wan, J. S. Luo, C. Zhou, T. Zhang, J. Arbiol, X. H. Lu, B. W. Mao, X. Zhang and J. Fransaer, *Adv. Funct. Mater.*, 2019, **29**, 1900315.
6. Y. Zhang, X. P. Shen, C. S. Song, Z. Y. Ji and F. H. Du, *J. Mater. Chem. A*, 2023, **11**, 8904-8911.
7. W. X. Lv, L. Zhu, L. Z. Cheng, Z. Wang, R. Zhang and W. Wang, *J. Appl. Electrochem.*, 2022, **52**, 1481-1489.
8. W. J. Song, M. Z. Xu, X. Teng, Y. Niu, S. Q. Gong, X. Liu, X. M. He and Z. F. Chen, *Nanoscale*, 2021, **13**, 1680-1688.
9. Y. J. Li, W. Y. Wang, B. J. Huang, Z. F. Mao, R. Wang, B. B. He, Y. S. Gong and H. W. Wang, *J.*

*Energy Chem.*, 2021, **57**, 99-108.

10. D. X. Yang, Z. Su, Y. F. Chen, K. Srinivas, X. J. Zhang, W. L. Zhang and H. P. Lin, *Chem. Eng. J.*, 2022, **430**, 133046.
11. J. Liu, S. T. Wei, N. B. Li, L. Zhang and X. Q. Cui, *Electrochim. Acta*, 2019, **299**, 575-581.
12. C. Gan, Q. Jiang, X. Wu and J. Tang, *Mater. Today Chem.*, 2023, **27**, 101330.
13. Z. L. Chen, M. Liu and R. B. Wu, *J. Catal.*, 2018, **361**, 322-330.
14. X. Li, Z. K. Kou, S. B. Xi, W. J. Zang, T. Yang, L. Zhang and J. Wang, *Nano Energy*, 2020, **78**, 105230.
